# Supplementary material for: What is the optimal assessment of speech? A multicentre, international evaluation of speech assessment in 2500 patients with a cleft
Source: HighWire-hosted journal article supplement (doi:10.1136/bmjopen-2023-071571), 2023-12-01
Supplement: bmjopen-2023-071571supp003_data_supplement.pdf [file bmjopen-2023-071571supp003_data_supplement.pdf]

## Appendix 2: descriptives for subgroup analyses

|                  | CP<br>(n=762) | CL(A)P<br>(n=1379) | Total<br>(n=2141) |
|------------------|---------------|--------------------|-------------------|
| <b>Gender</b>    |               |                    |                   |
| Male             | 308 (40.4%)   | 904 (65.6%)        | 1212 (56.6%)      |
| Female           | 454 (59.6%)   | 475 (34.4%)        | 929 (43.4%)       |
| <b>SDistress</b> |               |                    |                   |
| Number           | 517 (67.8%)   | 1068 (77.4%)       | 1585 (74.0%)      |
| Missing          | 245 (32.2%)   | 311 (22.6%)        | 556 (26.0%)       |
| <b>SFunction</b> |               |                    |                   |
| Number           | 519 (68.1%)   | 1076 (78.0%)       | 1595 (74.5%)      |
| Missing          | 243 (31.9%)   | 303 (22.0%)        | 546 (25.5%)       |
| <b>VPC</b>       |               |                    |                   |
| Number           | 173 (22.7%)   | 213 (15.4%)        | 386 (18.0%)       |
| Missing          | 589 (77.3%)   | 1166 (84.6%)       | 1755 (82.0%)      |
| <b>ICS</b>       |               |                    |                   |
| Number           | 169 (22.2%)   | 228 (16.5%)        | 397 (18.5%)       |
| Missing          | 593 (77.8%)   | 1151 (83.5%)       | 1744 (81.5%)      |
| <b>PCC score</b> |               |                    |                   |
| Number           | 152 (19.9%)   | 192 (13.92%)       | 344 (16.1%)       |
| Missing          | 610 (80.1%)   | 1187 (86.1%)       | 1797 (83.9%)      |

Descriptives of patients deriving from high income countries, including all patients from the ICHOM centers.
